# Supplementary material for: A novel strategy for the simultaneous discrimination of dopamine and epinephrine by cyclic square wave voltammetry implemented with a customized potentiostat
Source: Royal Society of Chemistry journal article supplement (doi:10.1039/d3nj01376f), 2023-01-01
Supplement: d3nj01376f1.pdf [file d3nj01376f1.pdf]

## Supplementary Information

### A novel strategy for the simultaneous discrimination of dopamine and epinephrine by cyclic square wave voltammetry implemented with a customized potentiostat

Yuheng Deng<sup>1</sup>, Jie Zhao<sup>1, \*</sup>, Yaoguang Yu<sup>2</sup>, Junhan Gao<sup>1</sup>, Shifan Zhao<sup>3,4</sup>, Jianying Yuan<sup>1</sup>, Qingze Han<sup>1</sup> and Guofeng Cui<sup>3,4</sup>

- <sup>1</sup> School of Mechanical and Automotive Engineering, South China University of Technology, Guangzhou 510640, People's Republic of China.
- <sup>2</sup> School of Materials, Sun Yat-sen University, Shenzhen 518107, People's Republic of China.
- <sup>3</sup> School of Chemistry, Sun Yat-Sen University, Guangzhou 510275, People's Republic of China.
- <sup>4</sup> Key Laboratory for Polymeric Composite & Functional Materials of Ministry of Education, School of Chemistry, Sun Yat-sen University, Guangzhou 510275, People's Republic of China.

Correspondence: zhaoj77@scut.edu.cn

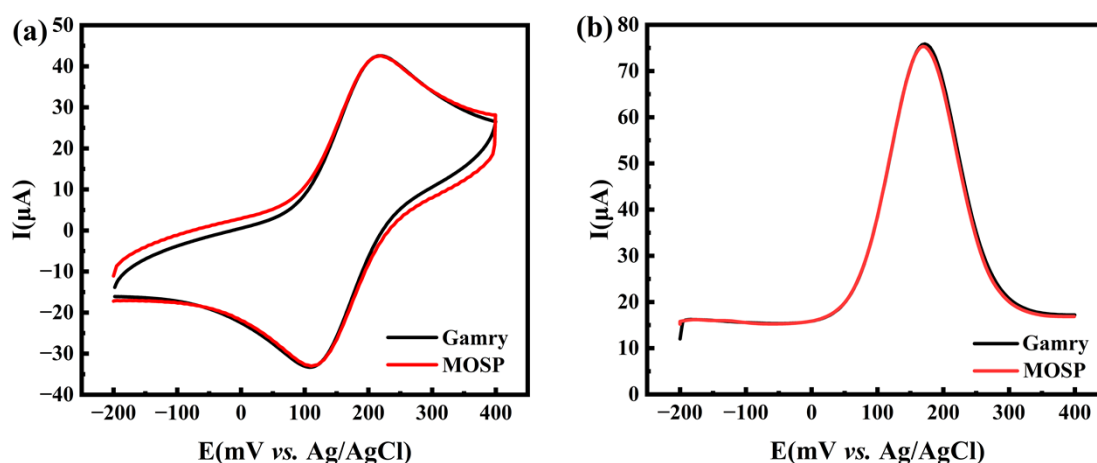

**Fig. S1** Comparison of modified open-source potentiostat and commercial electrochemical workstation Gamry Reference 600+ of (a) CV, and (b) SWV in 5mM [Fe(CN)<sub>6</sub>]<sup>3-/4-</sup> solution containing 0.1M KCl at GBIE.

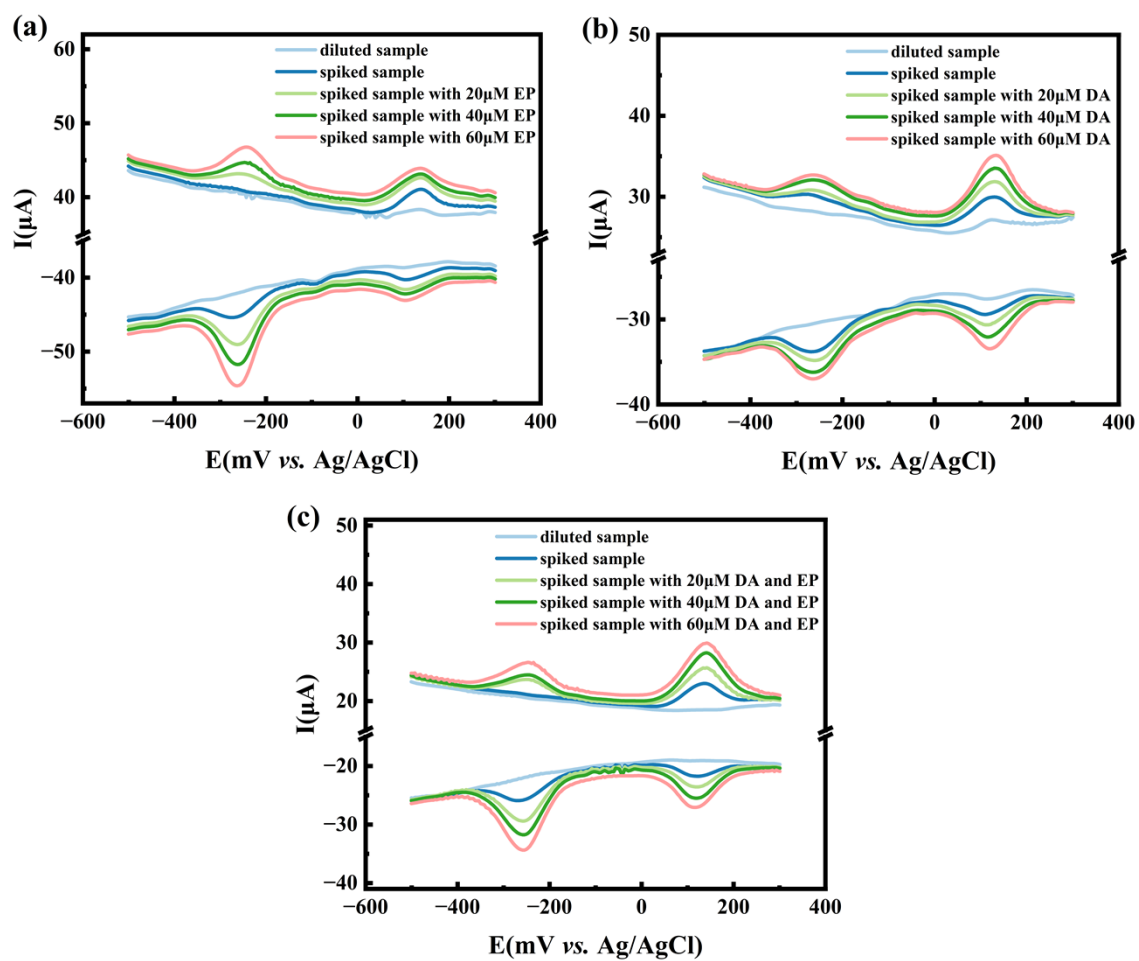

**Fig. S2** CSW voltammograms for the determination of the concentrations of EP, DA, and a mixture of DA and EP using the standard addition method in spiked calf serum samples at GBIE.
